# Inferring critical points of ecosystem transitions from spatial data

Sabiha Majumder<sup>\*1a</sup>, Krishnapriya Tamma<sup>†2a</sup>, Sriram Ramaswamy<sup>‡1</sup>, and Vishweshha Guttal<sup>§2</sup>

<sup>a</sup>These authors contributed equally to the manuscript

<sup>1</sup>Department of Physics, Indian Institute of Science, Bengaluru 560 012, India

<sup>2</sup>Centre for Ecological Sciences, Indian Institute of Science, Bengaluru 560 012, India

## Abstract

1  
2 Ecosystems can undergo abrupt transitions from one state to an alternative stable state  
3 when the driver crosses a threshold or a critical point. Dynamical systems theory suggests  
4 that systems take long to recover from perturbations near such transitions. This leads to  
5 characteristic changes in the dynamics of the system, which can be used as early warning  
6 signals of imminent transitions. However, these signals are qualitative and cannot quantify  
7 the critical points. Here, we propose a method to estimate critical points quantitatively  
8 from spatial data. We employ a spatial model of vegetation that shows a transition from  
9 vegetated to bare state. We show that the critical point can be estimated as the ecosystem  
10 state and the driver values at which spatial variance and autocorrelation are maximum.  
11 We demonstrate the validity of this method by analysing spatial data from regions of  
12 Africa and Australia that exhibit alternative vegetation biomes.

---

\*Corresponding author. Email: [sabiha@physics.iisc.ernet.in](mailto:sabiha@physics.iisc.ernet.in), Tel: +918023605797

†[priya.tamma@gmail.com](mailto:priya.tamma@gmail.com)

‡[sriram@physics.iisc.ernet.in](mailto:sriram@physics.iisc.ernet.in)

§[guttal@ces.iisc.ernet.in](mailto:guttal@ces.iisc.ernet.in)

## 13 **1 Introduction**

14 Many ecosystems, ranging from tropical forests to coral reefs, are stable across a range of  
15 environmental conditions. However, when a control parameter or driver in the environment  
16 crosses a threshold value, ecosystems may undergo abrupt shifts from their current state to an  
17 alternative state (Noy-Meir 1975; Scheffer *et al.* 2001; Hughes 1994; van de Koppel *et al.* 1997;  
18 Steele 1998). This threshold is called a critical point or, in the dynamical systems literature,  
19 a bifurcation. These drastic changes of state, termed critical transitions, may result in loss  
20 of biodiversity and ecosystem services. Therefore, estimating critical points and locating  
21 ecosystems' current parameters relative to such critical values are matters of importance.

22 Estimating critical points of real ecosystems can be notoriously difficult. One novel ap-  
23 proach relies on the analysis of dynamics of state variables following large perturbations (D'Souza  
24 *et al.* 2015); however, experimentally induced large perturbations can push the system to a  
25 transition. Critical points can also be estimated from long-term data of ecosystems that have  
26 previously undergone transitions (Ratajczak *et al.* 2014). Alternatively, one could construct  
27 a complete characterization of ecosystem states as a function of drivers (Hirota *et al.* 2011;  
28 Staver *et al.* 2011; Staal *et al.* 2016), and estimate critical points. However, these methods  
29 are limited to a few ecosystems where data are available in steady-state conditions and over  
30 large enough spatial or temporal scales, thus limiting their applicability. Therefore, most re-  
31 cent studies have focused on obtaining qualitative 'early warning signals' (EWS) of critical  
32 transitions which are based on theories of dynamical systems and phase transitions (Wissel  
33 1984; Scheffer *et al.* 2009; Carpenter & Brock 2006; Guttal & Jayaprakash 2008; Van Nes &  
34 Scheffer 2007).

35 These EWS have been empirically tested in aquatic, savanna and climatic systems (Carpenter  
36 *et al.* 2011; Eby *et al.* 2017; Dakos *et al.* 2008). Various studies have also highlighted their  
37 limitations (Boettiger & Hastings 2013), for example, due to insufficient sampling, stochastic-  
38 ity or short length of ecological datasets (Perretti & Munch 2012; Guttal *et al.* 2016; Burthe  
39 *et al.* 2016). Even reliable measurements of these signals do not provide quantitative estimates  
40 of how far the system parameters are from the critical point.

41 The goal of our manuscript is to develop a method that offers quantitative estimates of crit-  
42 ical points. We hypothesise that values of drivers and state variables in regions with maximum  
43 spatial variance and autocorrelation of ecosystem states offer estimates of critical point (Box  
44 1). We argue that this method is applicable even if data are not in steady-state conditions and  
45 are available only at relatively small scales than those required for a complete characterisation

46 of ecosystem states. We justify our claim based on analyses of models and remotely-sensed  
47 vegetation data from Africa and Australia. Therefore, one can employ transects that span  
48 alternative stable states of ecosystems. The parameters of biomass density, grazing or rainfall  
49 values at which maxima of spatial metrics occur offer approximations of the critical points.

## 50 **2 Box 1: Maxima of spatial variance and autocorrelation occur** 51 **at the critical point**

52 To see why spatial variance and autocorrelation are maximum at the critical point, we consider  
53 a generic model of abrupt transition given by

$$\frac{\partial B(x, t)}{\partial t} = f(B) + D\nabla^2 B(x, t) + \sigma\eta(x, t) \quad (1)$$

54 where  $f(B)$  represents local growth rate of population density  $B$ , the second term (diffusion)  
55 represents spatial interactions and the third term represents Gaussian fluctuations, uncorre-  
56 lated in space ( $x$ ) and time ( $t$ ), with a strength  $\sigma$ . We assume  $f(B)$  such that the nonspatial  
57 and deterministic version of Eq (1) exhibits multiple stable states and a saddle-node bifurca-  
58 tion. We investigate the dynamics for the spatially-extended case in a simplified analytical  
59 approach, working in one space dimension and linearising the system in the vicinity of a stable  
60 state, to obtain

$$\frac{\partial b(x, t)}{\partial t} = -\alpha b(x, t) + D\nabla^2 b(x, t) + \sigma\eta(x, t) \quad (2)$$

61 where  $b(x, t) = B(x, t) - B_1^*$  and  $\alpha$  measures the distance from the critical point. The spatial  
62 variance ( $\sigma_s^2$ ) and autocorrelation ( $ACF$ ) of this system variable ( $b$ ) are easily found to be:

$$\sigma_s^2 = \frac{\sigma^2}{4\sqrt{D\alpha}} \quad ACF(r) = e^{-r\sqrt{\frac{\alpha}{D}}} \quad (3)$$

63 Thus, approaching the critical point ( $\alpha \rightarrow 0$ ) gives rise to enhanced fluctuations of the  
64 ecosystem state and extended correlations in space (Guttal 2008; Guttal & Jayaprakash 2009;  
65 Dakos *et al.* 2010). At the critical point ( $\alpha = 0$ ), within our approximation,  $\sigma_s^2$  is infinite  
66 and  $ACF(r)$  becomes unity for all  $r$  (Scheffer *et al.* 2009). These extreme results arise can  
67 be traced to the linearised approximation which is well known (Chaikin & Lubensky (2000),  
68 chapter 5) to exaggerate fluctuation magnitudes for one- or two-dimensional systems. An exact  
69 calculation based on the theory of critical phenomena (Chaikin & Lubensky 2000) shows that  
70  $\sigma_s^2$  remains finite,  $ACF$  decays with  $r$ , but both attain a maximum at the critical point.

71 Based on these observations, we hypothesise that maxima in both spatial variance and  
72 spatial autocorrelation of the state indicates that the system is at the critical point of a  
73 transition.

## 74 **3 Material and methods**

### 75 **3.1 Analyses of spatially-explicit models to identify critical points**

#### 76 **Spatially-explicit model showing critical transitions**

77 In our model, the landscape contains  $N \times N$  cells, with each cell in a state of being empty (0) or  
78 occupied by a plant (1). In the simplest version of this model, known as contact process (Dur-  
79 rett & Neuhauser 1991), a focal plant germinates a nearby empty cell with probability  $p$ , or  
80 dies with a probability  $1 - p$ . This model exhibits a transition from a bare state ( $p < p_c$ )  
81 to vegetated state ( $p \geq p_c$ ) with the critical point  $p_c \approx 0.62$ . This transition is, however,  
82 *continuous*. We therefore consider an extended version of the model (Lübeck 2006). Here, the  
83 baseline birth ( $p$ ) and death ( $1 - p$ ) probabilities are modified via a local positive feedback  
84 (denoted by  $q$ ), as an increase in birth probability and a decrease in death probability for  
85 plants which are surrounded by other plants. We assume that parameters  $p$  and  $q$  do not vary  
86 across cells and hence call this a ‘homogeneous-driver model’. This model with large  $q$  exhibits  
87 a *discontinuous* transition from a vegetated state ( $\rho_c = 0.32$ ) to bare state at a critical value  
88 of the driver ( $p_c = 0.2852$ ; see Fig. S2 in Appendix S2 in Supporting information).

#### 89 **Model with a gradient of driver along space**

90 To reflect real-world situations where drivers such as rainfall, grazing or fire are spatially  
91 heterogeneous, we consider a simple case where the driver changes from low to high values  
92 along one dimension of a two dimensional landscape; for instance, this may represent rainfall  
93 gradients observed in tropical forest biomes or savanna ecosystems (Favier *et al.* 2012; Eby  
94 *et al.* 2017). Hence, we model the landscape as a rectangular matrix of width  $N$  and length  
95  $N \times l$  with a homogeneous positive feedback ( $q$ ). However, the baseline birth probability ( $p$ )  
96 increases from  $p_l$  to  $p_h$  along the length of the matrix such that the system in its steady state  
97 exhibits a transition in this range of  $p$  (Fig. S4 in Appendix S2). We call this a ‘gradient-driver  
98 model’. Since real-world ecosystems are rarely in steady state, we stopped the simulation  
99 at 1500 time steps; this is in contrast to steady-state simulations that require 1 million time  
100 steps near critical points.



## 101 Null model

102 We use a null model from (Kéfi *et al.* 2011) where both birth ( $p$ ) and death ( $d$ ) probabilities are  
103 independent of the state of the neighbouring cells. Here, vegetation density reduces gradually  
104 as a function of reducing  $p$ , with no critical points.

## 105 Computing spatial metrics

106 We compute spatial variance and spatial autocorrelation at lag-1 using methods from Kéfi  
107 *et al.* (2014); Sankaran *et al.* (2017). Studies show that spatial variance in binary-state spatial  
108 data (e.g. occupied (1) or empty (0) at each location) depends only on mean cover and does  
109 not capture spatial structure of the data (Eby *et al.* 2017; Sankaran *et al.* 2017). One must  
110 average spatial data over local spatial scales, known as ‘coarse-graining’ (Sethna 2006), before  
111 computing spatial metrics. To restate our hypothesis in the context of this method, we expect  
112 spatial variance (referred to as variance method) and spatial ACF-1 (autocorrelation at lag  
113 1, referred to as ACF method) to be maximum at critical points if the data are optimally  
114 coarse-grained. See Appendix S1 for formula for spatial metrics, details on coarse-graining  
115 spatial data by a scale  $l_{cg}$  and a method to obtain an ‘optimal coarse-graining length ( $\hat{l}_{cg}$ )’ at  
116 which critical points can be estimated.

## 117 3.2 Validation of the method using real data

118 To demonstrate the empirical validity of our method, we used vegetation data from three  
119 regions as shown in Fig. 2. We first estimate critical points from our method at the relatively  
120 small spatial scale of transects (8 km  $\times$  90 km) that span alternative stable states of vegetation.  
121 We then compare these estimated values to those from an independent method at a larger  
122 *landscape scale* from these regions ( $\sim$  200 km  $\times$  250 km).

## 123 Study sites

124 We use results from Staver *et al.* (2011) to find regions ( $\sim$ 200 km  $\times$  250 km) that show bistable  
125 states of forests and grasslands (Appendix S3). We choose two regions, one in Australia (Box-A  
126 shown in Fig. 2) and one at the Congo-Gabon border in Africa (Box-B), where the vegetation  
127 cover varies from high ( $\sim$  70%) to low ( $\sim$  20%). We also select a region including Serengeti  
128 National Park (Box-C), which shows low vegetation cover ( $<$  35%).

## 129 **Vegetation and Rainfall Data**

130 Remotely-sensed vegetation indices, such as Normalized Difference Vegetation Index (NDVI)  
131 and Enhanced Vegetation Index (EVI), are related to the amount of photosynthetic activity.  
132 We employ EVI as a proxy for vegetation cover since, unlike NDVI, it does not saturate at high  
133 values of photosynthetic activity and thus is a better proxy for both low and high vegetation  
134 covers (Glenn *et al.* 2008). We obtain EVI data from the Moderate Resolution Imaging  
135 Spectroradiometer (MODIS; using Google Earth Engine platform (Google Earth Engine Team  
136 2015) for 2010 at 250 m resolution (Huete *et al.* 2002). We choose the dry months (June -  
137 August) to minimise cloud cover. We analyse the relation between rainfall (WorldClim , 1 km  
138 resolution) (Hijmans *et al.* 2005)) and vegetation cover as rainfall is an important driver of  
139 vegetation (Sankaran *et al.* 2008; Hirota *et al.* 2011; Staver *et al.* 2011).

## 140 **Estimating critical points from transects**

141 We construct 8 km  $\times$  90 km transects, which are  $\sim$  1.5% of area of Boxes, within each  
142 landscape such that they capture the gradient in EVI (Fig. 2). Transect-3 in Box-A is limited  
143 to 70km to avoid regions of high human activity, and Transect-1 in Box-C to 60km to avoid  
144 steep changes in altitude.

145 For each transect, we employ a moving window of size 8 km  $\times$  8 km, with a moving distance  
146 of 2km along its length. We calculate spatial variance and ACF-1 of coarse-grained EVI data  
147 along the moving window. We smooth the spatial-metrics data using ‘smooth.spline’ in R (v  
148 3.3.1) and identify peaks as local maxima of the smoothed function. If the peaks in spatial  
149 variance and spatial ACF-1 occur within a distance of 4 km, we define them as coinciding  
150 peaks. To test if the coincidence of the peaks can occur by chance, we compute the spatial  
151 metrics on null transect data, which is obtained by shuffling EVI data for each moving window  
152 of the transect. We also test if the peaks are likely to be caused by landscape heterogeneity (see  
153 below). We hypothesise that coinciding peaks in spatial variance and ACF-1 in the absence  
154 of such confounding effects correspond to the critical points. See Appendix S5 for a detailed  
155 step-by-step procedure.

## 156 **Confounding factors: Human influence and landscape heterogeneity**

157 We only choose regions with minimal human influence (using the 2009 GlobCover maps (Bon-  
158 temps *et al.* 2011)). The observed patterns of spatial metrics in vegetation transects may also  
159 arise from landscape heterogeneity, such as elevation, aspect, slope and soil variations (Reed

160 *et al.* 2009), rather than as a consequence of the underlying dynamics. We compute land-  
161 scape heterogeneity (calculated as spatial variance in elevation, slope, aspect, and soil-type  
162 richness) along each transect and identify its peaks, referred as heterogeneity peaks, based on  
163 the smoothing procedure described previously. We then reject peaks in spatial variance and  
164 ACF-1 if they occur within 4 km of any of the heterogeneity peaks.

165

## 166 **Multimodality in vegetation cover and estimation of critical points from landscape** 167 **analyses**

168 We divide rainfall into 100 mm bins (Hirota *et al.* 2011). For each bin, we smooth the frequency  
169 distribution of EVI using the function ‘density’ in R (v 3.3.1) and identify modes as local  
170 maxima of the density functions (Appendix S4). We test whether the observed multimodality  
171 in EVI is associated with multimodality in rainfall, and reject such modes because they are  
172 unlikely to reflect alternative stable states in EVI. Now, from the location of remaining modes,  
173 we obtain an independent estimate of critical points, defined as the rainfall levels at which  
174 EVI distributions change from bimodal to unimodal. We refer to the resulting plots of modes  
175 vs rainfall as ‘state diagrams’.

## 176 **4 Results**

### 177 **4.1 Estimating critical points in models**

#### 178 **Spatial variance and autocorrelation can estimate critical points in the models**

179 We apply our method to three scenarios of the gradient-driver model (Fig. 1). In steady-  
180 state conditions, they correspond to qualitatively different behaviours, i.e. no transition, a  
181 continuous transition and a discontinuous transition, respectively (Fig. S4 in Appendix S2).  
182 In nonsteady-state conditions, however, the analysis of driver-state relationships alone (Fig. 1  
183 A, B or C), may not be sufficient to yield critical points. This is because vegetation cover  
184 changes gradually from large values to the bare state in all three cases. As we describe below,  
185 our methods provide estimates that are reasonably close to the steady-state critical points  
186 even when applied to nonsteady-state data.

187 Spatial variance for raw data (i.e. without coarse-graining,  $l_{cg} = 1$ ) shows a maximum  
188 value for the snapshot with 50% cover (Fig. 1 A1, B1, C1), which is not the critical value  
189 of cover in our models. This is expected, as argued previously (Eby *et al.* 2017; Sankaran

190 *et al.* 2017), in binary-valued spatial data. In the null model, the peak of variance does not  
191 change with  $l_{cg}$  (Fig. 1 A1, A2). In contrast, for both continuous and discontinuous transition  
192 models, after coarse-graining, the values of cover and driver with maximum spatial variance,  
193 denoted as  $\rho_m$  and  $p_m$  respectively, change with increasing  $l_{cg}$ , converging to the steady-state  
194 critical-point values  $\rho_c$  and  $p_c$  (Fig. 1 B1, B2, C1, C2). Likewise, patterns of spatial ACF-1  
195 differ between the null model and the other two models with transitions, with the null model  
196 showing no peak as a function of density.

197 Due to the lack of match in the patterns of peaks of spatial variance and ACF-1, we  
198 conclude that the null model, as expected, has no critical points. In contrast, for the continuous  
199 transition scenario, the variance and the ACF methods yield critical points of  $(\rho, p)=(0, 0.63)$   
200 and  $(0, 0.623)$  respectively. These values are close to the steady-state critical point  $(\rho_c, p_c)=(0,$   
201  $0.623)$ . Likewise, for the discontinuous transition scenario, the variance and the ACF methods  
202 yield estimates of  $(\rho, p)=(0.30, 0.2838)$  and  $(0.28, 0.2835)$  which are reassuringly close to the  
203 actual critical point in steady state  $(\rho_c, p_c)= (0.32, 0.2851)$ .

204 Our method can also estimate critical points in models of semi-arid vegetation that incor-  
205 porate complex and detailed ecological processes (Kéfi *et al.* 2007; Schneider & Kéfi 2015)  
206 (Fig. S5 in Appendix S2). These findings provide a proof of principle, encouraging us to apply  
207 this method to real world data.

## 208 4.2 Application to find critical points in real ecosystems

### 209 Estimation of critical points from transects

210 We show the results of one representative transect from each box in Fig. 3 and others are  
211 shown in Fig. S13, S14, S15 in Appendix S5. For all transects, EVI typically increases with  
212 rainfall (Fig. 3 A1-C1). We find multiple peaks of spatial variance and ACF-1 in EVI for  
213 these transects. We reject peaks that occur in the vicinity of the landscape heterogeneity  
214 peaks (grey bands). Rainfall values corresponding to coinciding peaks of spatial variance and  
215 ACF-1, 1108 - 1334 mm/year for Box-A and 1281 - 1306 mm/year for Box-B (Table 1), are  
216 estimated as critical points of the transition. For Box-C, after accounting for heterogeneity,  
217 we found no coinciding peaks, and hence no critical point estimations, in any of the transects.

218 We compute the same metrics for the null transect data and show that the peaks of spatial  
219 variance and ACF-1 for Box-A and Box-B do not coincide by chance (Fig. S16 in Appendix  
220 S6). We also show that our estimations are robust to the choice of smoothing parameter (Fig.  
221 S17 in Appendix S6) and the width of the region (from 4 km to 16 km) eliminated because of

222 landscape heterogeneity . The only exception is in Box-B for the width of heterogeneity region  
223 12 km (or 16 km); we find that one (or both) of the critical point estimations are confounded.

## 224 **Estimated critical points from transects in Box-A and Box-B lie close to critical** 225 **points of the state diagram**

226 The state diagrams of Box-A and Box-B show bimodality with high and low EVI values at  
227 intermediate rainfall values (Fig. 4 A,B); the occurrence of bimodality in EVI is not associ-  
228 ated with bimodality in rainfall (Fig S6, S7 in Appendix S4). This suggests the existence of  
229 alternative stable states in these regions. Recall that critical points can be independently  
230 estimated as the threshold for the onset or disappearance of bimodality in a state diagram.  
231 For Box-A, we obtain an estimate of the critical value to be around 1000-1100 mm mm/year  
232 for the transition from high to low EVI state (Fig. 4 A); from transects, the estimated critical  
233 rainfall values range from 1108 to 1334 mm/year (Table 1). Likewise, in Box-B (Africa), the  
234 estimated critical points from the state diagram (1300-1400 mm) are close to estimates from  
235 analyses of transects (1281, 1306 mm; Table 1). We do not get any estimates from transects in  
236 the control Box-C, which is consistent with the state diagram as there is only one EVI mode  
237 at a given rainfall value (Fig. 4 C).

## 238 **5 Discussion**

239 Our analyses of spatial models showed that the ecological state and driver values correspond-  
240 ing to regions with simultaneous maxima of spatial variability and autocorrelations offer a  
241 quantitative estimation of critical points. We demonstrated the validity of the method using  
242 remotely-sensed vegetation data from regions in Africa and Australia. Our findings show that  
243 it is possible to estimate critical points and to identify critical regions prone to regime shifts  
244 in the future from spatial data of ecological systems.

245 Our method can be applied on spatial snapshots spanning alternative stable states of  
246 ecosystems even when they are in nonsteady-state conditions. A gradient of states is often  
247 maintained by an underlying gradient of a driver. Using such data, one can obtain a relation  
248 between the state of the ecosystem and the driver. Since real world data is rarely in steady  
249 state, this relationship may not show a threshold behaviour even if the underlying dynamics  
250 exhibits a critical point. We tested the applicability of our method in non-steady state condi-  
251 tions by simulating three scenarios: (a) a null model that exhibits no transition (Fig. 1 A), (b)  
252 a model that shows continuous transition (Fig. 1 B) and (c) a strong positive feedback model

253 that exhibits abrupt critical transition (Fig. 1 C). Even under such circumstances masking the  
254 underlying character of the transitions, our method offers reasonable estimates of the critical  
255 points, thus showing promise for real world applications.

256 Our method allows estimation of critical points even with relatively small spatial datasets.  
257 We found that critical-point estimates (Table 1) from transects (8 km  $\times$  90 km) are compa-  
258 rable to those from an independent method that used data at regional scales (200 km  $\times$  250  
259 km, about two orders of magnitude larger than transects). We compared our results with a  
260 previous study at a continental scale that used a different dataset (MODIS woody cover from  
261 Africa) (Staal *et al.* 2016). From Fig. 3 of Staal *et al.* (2016), we identified the critical points  
262 of transition from high to low cover to be 1300-1400 mm mean annual rainfall, comparable  
263 to our estimates. Consistency of results across scales lends credence to our claim that crit-  
264 ical points can be quantified even with relatively small spatial datasets, offering promise of  
265 applications to ecosystems.

266 Is our method prone to false or failed positives? In our study, we did not find any false  
267 positives. Specifically, we chose a control region with no critical points (Box-C); none of  
268 the transects in this region provide estimations of critical points. On the other hand, our  
269 method has a failure rate. For example, one of three transects in both Box-A and Box-B  
270 (transect-2 in Box-A and transect-1 in Box-B) failed to provide any estimations of critical  
271 points. Nevertheless, even in these failed transects, both spatial variance and ACF-1 peak  
272 at the critical rainfall values expected from the state diagrams. However, those regions also  
273 occur in the vicinity of landscape heterogeneity peaks. It is difficult to disentangle whether  
274 the peak is because of the internal dynamics or the external heterogeneity and therefore, we  
275 did not consider estimates from these transects.

276 Ecosystems also exhibit *regular* or Turing-like patterned states, such as gaps, labyrinths or  
277 spots (Rietkerk & Van de Koppel 2008), with a characteristic length-scale of spatial variation.  
278 Such regular patterns, not considered in our study, may arise from scale-dependent processes  
279 such as short-scale positive feedback with a large-scale negative feedback (Borgogno *et al.*  
280 2009; Meron 2012). Even in these systems, approach to critical points can be preceded by  
281 critical slowing down, simplest measures of spatial (Dakos *et al.* 2011; Kéfi *et al.* 2014). It  
282 is worth exploring, both theoretically and empirically, whether our proposed method can be  
283 applied to such pattern forming systems. This may require probing fluctuations around the  
284 characteristic scale of the pattern.

285 Tropical vegetation biomes show multimodality as a function of rainfall (Hirota *et al.* 2011).

286 If we apply our method to spatial gradients that span such multiple stable states, we expect  
287 the maxima of variance and autocorrelation to occur at multiple locations, each corresponding  
288 to transition point between alternative states. Occurrence of such maxima can be confounded  
289 when the driver gradient is steep; for example, when the driver gradient exceeds a threshold  
290 value, a new type of transition, known as rate-induced tipping, can arise in dynamical systems  
291 (Ashwin *et al.* 2012; Siteur *et al.* 2016). Given that our driver gradients are modest (Fig 3  
292 A1-C1), our inferences are possibly free of such complications.

293 Given the generality of the principles that underlie our method, it can be applied to a  
294 variety of ecosystems that exhibit alternative stable states. Therefore, our method enables  
295 ecosystem managers to obtain estimates of threshold or critical values of ecosystem drivers.  
296 Unlike previous qualitative early-warning indicators, our method allows for the quantitative  
297 estimation of critical points. Future research could focus on extending our methods to exploit  
298 not only spatial snapshots but also how those patterns change over time (Verbesselt *et al.*  
299 2016; Weissmann & Shnerb 2016).

## 300 6 Acknowledgements

301 VG acknowledges support from a DBT Ramalingaswami fellowship, the DBT-IISc partner-  
302 ship program, and the ISRO-IISc Space Technology Cell. KT was supported by a National  
303 Postdoctoral Fellowship from SERB, Govt. of India. SR was supported in part by a J C Bose  
304 National Fellowship of the SERB, Govt. of India. Authors declare no conflicting interests.

## 305 References

- 306 Ashwin, P., Wieczorek, S., Vitolo, R. & Cox, P. (2012). Tipping points in open systems:  
307 bifurcation, noise-induced and rate-dependent examples in the climate system. *Phil. Trans.*  
308 *R. Soc. A*, 370, 1166–1184.
- 309 Boettiger, C. & Hastings, A. (2013). Tipping points: From patterns to predictions. *Nature*,  
310 493, 157–158.
- 311 Bontemps, S., Defourny, P., Bogaert, E. V., Arino, O., Kalogirou, V. & Perez, J. R. (2011).  
312 Globcover 2009-products description and validation report.
- 313 Borgogno, F., D’Odorico, P., Laio, F. & Ridolfi, L. (2009). Mathematical models of vegetation  
314 pattern formation in ecohydrology. *Reviews of Geophysics*, 47, RG1005.



- 315 Burthe, S. J., Henrys, P. A., Mackay, E. B., Spears, B. M., Campbell, R., Carvalho, L.,  
316 Dudley, B., Gunn, I. D., Johns, D. G., Maberly, S. C. *et al.* (2016). Do early warning  
317 indicators consistently predict nonlinear change in long-term ecological data? *Journal of*  
318 *Applied Ecology*, 53, 666–676.
- 319 Carpenter, S. & Brock, W. (2006). Rising variance: a leading indicator of ecological transition.  
320 *Ecology letters*, 9, 311–318.
- 321 Carpenter, S. R., Cole, J. J., Pace, M. L., Batt, R., Brock, W., Cline, T., Coloso, J., Hodgson,  
322 J. R., Kitchell, J. F., Seekell, D. A. *et al.* (2011). Early warnings of regime shifts: a whole-  
323 ecosystem experiment. *Science*, 332, 1079–1082.
- 324 Chaikin, P. M. & Lubensky, T. C. (2000). *Principles of condensed matter physics*, vol. 1.  
325 Cambridge Univ Press.
- 326 Dakos, V., Kéfi, S., Rietkerk, M., Van Nes, E. H. & Scheffer, M. (2011). Slowing down in  
327 spatially patterned ecosystems at the brink of collapse. *The American Naturalist*, 177,  
328 E153–E166.
- 329 Dakos, V., Scheffer, M., van Nes, E. H., Brovkin, V., Petoukhov, V. & Held, H. (2008).  
330 Slowing down as an early warning signal for abrupt climate change. *Proceedings of the*  
331 *National Academy of Sciences*, 105, 14308–14312.
- 332 Dakos, V., van Nes, E. H., Donangelo, R., Fort, H. & Scheffer, M. (2010). Spatial correlation  
333 as leading indicator of catastrophic shifts. *Theoretical Ecology*, 3, 163–174.
- 334 Durrett, R. & Neuhauser, C. (1991). Epidemics with recovery in  $d=2$ . *The Annals of Applied*  
335 *Probability*, 189–206.
- 336 D’Souza, K., Epureanu, B. I. & Pascual, M. (2015). Forecasting bifurcations from large  
337 perturbation recoveries in feedback ecosystems. *PloS ONE*, 10, e0137779.
- 338 Eby, S., Agrawal, A., Majumder, S., Dobson, A. P. & Guttal, V. (2017). Alternative stable  
339 states and spatial indicators of critical slowing down along a spatial gradient in a savanna  
340 ecosystem. *Global Ecology and Biogeography*, 26, DOI: 10.1111/geb.12570.
- 341 Favier, C., Aleman, J., Bremond, L., Dubois, M. A., Freycon, V. & Yangakola, J.-M. (2012).  
342 Abrupt shifts in african savanna tree cover along a climatic gradient. *Global Ecology and*  
343 *Biogeography*, 21, 787–797.



- 344 Glenn, E. P., Huete, A. R., Nagler, P. L. & Nelson, S. G. (2008). Relationship between  
345 remotely-sensed vegetation indices, canopy attributes and plant physiological processes:  
346 what vegetation indices can and cannot tell us about the landscape. *Sensors*, 8, 2136–2160.
- 347 Google Earth Engine Team (2015). Google earth engine: A planetary-scale geo-spatial analysis  
348 platform. URL <https://earthengine.google.com>.
- 349 Guttal, V. (2008). *Applications of nonequilibrium statistical physics to ecological systems*.  
350 Ph.D. thesis, The Ohio State University.
- 351 Guttal, V. & Jayaprakash, C. (2008). Changing skewness: an early warning signal of regime  
352 shifts in ecosystems. *Ecology letters*, 11, 450–460.
- 353 Guttal, V. & Jayaprakash, C. (2009). Spatial variance and spatial skewness: leading indicators  
354 of regime shifts in spatial ecological systems. *Theoretical Ecology*, 2, 3–12.
- 355 Guttal, V., Raghavendra, S., Goel, N. & Hoarau, Q. (2016). Lack of critical slowing down  
356 suggests that financial meltdowns are not critical transitions, yet rising variability could  
357 signal systemic risk. *PloS ONE*, 11, e0144198.
- 358 Hijmans, R. J., Cameron, S. E., Parra, J. L., Jones, P. G. & Jarvis, A. (2005). Very high  
359 resolution interpolated climate surfaces for global land areas. *International journal of cli-*  
360 *matology*, 25, 1965–1978.
- 361 Hirota, M., Holmgren, M., Van Nes, E. H. & Scheffer, M. (2011). Global resilience of tropical  
362 forest and savanna to critical transitions. *Science*, 334, 232–235.
- 363 Huete, A., Didan, K., Miura, T., Rodriguez, E. P., Gao, X. & Ferreira, L. G. (2002). Overview  
364 of the radiometric and biophysical performance of the modis vegetation indices. *Remote*  
365 *sensing of environment*, 83, 195–213.
- 366 Hughes, T. P. (1994). Catastrophes, phase shifts, and large-scale degradation of a caribbean  
367 coral reef. *Science-AAAS-Weekly Paper Edition*, 265, 1547–1551.
- 368 Kéfi, S., Guttal, V., Brock, W. A., Carpenter, S. R., Ellison, A. M., Livina, V. N., Seekell,  
369 D. A., Scheffer, M., van Nes, E. H., Dakos, V. *et al.* (2014). Early warning signals of  
370 ecological transitions: methods for spatial patterns. *PloS ONE*, 9, e92097.
- 371 Kéfi, S., Rietkerk, M., Alados, C. L., Pueyo, Y., Papanastasis, V. P., ElAich, A. & De Ruiter,  
372 P. C. (2007). Spatial vegetation patterns and imminent desertification in mediterranean  
373 arid ecosystems. *Nature*, 449, 213–217.

- 374 Kéfi, S., Rietkerk, M., Roy, M., Franc, A., De Ruiter, P. C. & Pascual, M. (2011). Robust  
375 scaling in ecosystems and the meltdown of patch size distributions before extinction. *Ecology*  
376 *letters*, 14, 29–35.
- 377 Lübeck, S. (2006). Tricritical directed percolation. *Journal of statistical physics*, 123, 193–221.
- 378 Meron, E. (2012). Pattern-formation approach to modelling spatially extended ecosystems.  
379 *Ecological Modelling*, 234, 70–82.
- 380 Noy-Meir, I. (1975). Stability of grazing systems: an application of predator-prey graphs. *The*  
381 *Journal of Ecology*, 63, 459–481.
- 382 Perretti, C. T. & Munch, S. B. (2012). Regime shift indicators fail under noise levels commonly  
383 observed in ecological systems. *Ecological Applications*, 22, 1772–1779.
- 384 Ratajczak, Z., Nippert, J. B. & Ocheltree, T. W. (2014). Abrupt transition of mesic grassland  
385 to shrubland: evidence for thresholds, alternative attractors, and regime shifts. *Ecology*, 95,  
386 2633–2645.
- 387 Reed, D., Anderson, T., Dempewolf, J., Metzger, K. & Serneels, S. (2009). The spatial  
388 distribution of vegetation types in the serengeti ecosystem: the influence of rainfall and  
389 topographic relief on vegetation patch characteristics. *Journal of Biogeography*, 36, 770–  
390 782.
- 391 Rietkerk, M. & Van de Koppel, J. (2008). Regular pattern formation in real ecosystems.  
392 *Trends in ecology & evolution*, 23, 169–175.
- 393 Sankaran, M., Ratnam, J. & Hanan, N. (2008). Woody cover in african savannas: the role of  
394 resources, fire and herbivory. *Global Ecology and Biogeography*, 17, 236–245.
- 395 Sankaran, S., Majumder, S., Kéfi, S. & Guttal, V. (2017). Implications of being discrete and  
396 spatial for detecting early warning signals of regime shifts. *Ecological Indicators*.
- 397 Scheffer, M., Bascompte, J., Brock, W. A., Brovkin, V., Carpenter, S. R., Dakos, V., Held,  
398 H., Van Nes, E. H., Rietkerk, M. & Sugihara, G. (2009). Early-warning signals for critical  
399 transitions. *Nature*, 461, 53–59.
- 400 Scheffer, M., Carpenter, S., Foley, J. A., Folke, C. & Walker, B. (2001). Catastrophic shifts  
401 in ecosystems. *Nature*, 413, 591–596.

- 402 Schneider, F. D. & Kéfi, S. (2015). Spatially heterogeneous pressure raises risk of catastrophic  
403 shifts. *Theoretical Ecology*, 9, 207–217.
- 404 Sethna, J. (2006). *Statistical mechanics: entropy, order parameters, and complexity*. Oxford  
405 University Press.
- 406 Siteur, K., Eppinga, M. B., Doelman, A., Siero, E. & Rietkerk, M. (2016). Ecosystems off  
407 track: rate-induced critical transitions in ecological models. *Oikos*, 125, 1689–1699.
- 408 Staal, A., Dekker, S. C., Xu, C. & van Nes, E. H. (2016). Bistability, spatial interaction, and  
409 the distribution of tropical forests and savannas. *Ecosystems*, 19, 1080–1091.
- 410 Staver, A. C., Archibald, S. & Levin, S. A. (2011). The global extent and determinants of  
411 savanna and forest as alternative biome states. *Science*, 334, 230–232.
- 412 Steele, J. H. (1998). Regime shifts in marine ecosystems. *Ecological Applications*, 8, S33–S36.
- 413 van de Koppel, J., Rietkerk, M. & Weissing, F. J. (1997). Catastrophic vegetation shifts and  
414 soil degradation in terrestrial grazing systems. *Trends in Ecology & Evolution*, 12, 352–356.
- 415 Van Nes, E. H. & Scheffer, M. (2007). Slow recovery from perturbations as a generic indicator  
416 of a nearby catastrophic shift. *The American Naturalist*, 169, 738–747.
- 417 Verbesselt, J., Umlauf, N., Hirota, M., Holmgren, M., Van Nes, E. H., Herold, M., Zeileis,  
418 A. & Scheffer, M. (2016). Remotely sensed resilience of tropical forests. *Nature Climate  
419 Change*, 6, 1028–1031.
- 420 Weissmann, H. & Shnerb, N. M. (2016). Predicting catastrophic shifts. *Journal of theoretical  
421 biology*, 397, 128–134.
- 422 Wissel, C. (1984). A universal law of the characteristic return time near thresholds. *Oecologia*,  
423 65, 101–107.

| Transect no. | Box-A           |            | Box-B           |            | Box-C           |     |
|--------------|-----------------|------------|-----------------|------------|-----------------|-----|
|              | CP estimated by |            | CP estimated by |            | CP estimated by |     |
|              | Variance method | ACF method | Variance method | ACF method | Variance        | ACF |
| 1            | 1334 mm         | 1283mm     | -               | -          | -               | -   |
| 2            | -               | -          | 1306 mm         | 1306 mm    | -               | -   |
| 3            | 1108 mm         | 1108 mm    | 1281 mm         | 1281 mm    | -               | -   |

**Table 1:** Estimates of the critical values of mean annual rainfall in Box-A, Box-B and Box-C from the transects using variance and ACF methods. Dash represents the transects which do not provide any estimates.

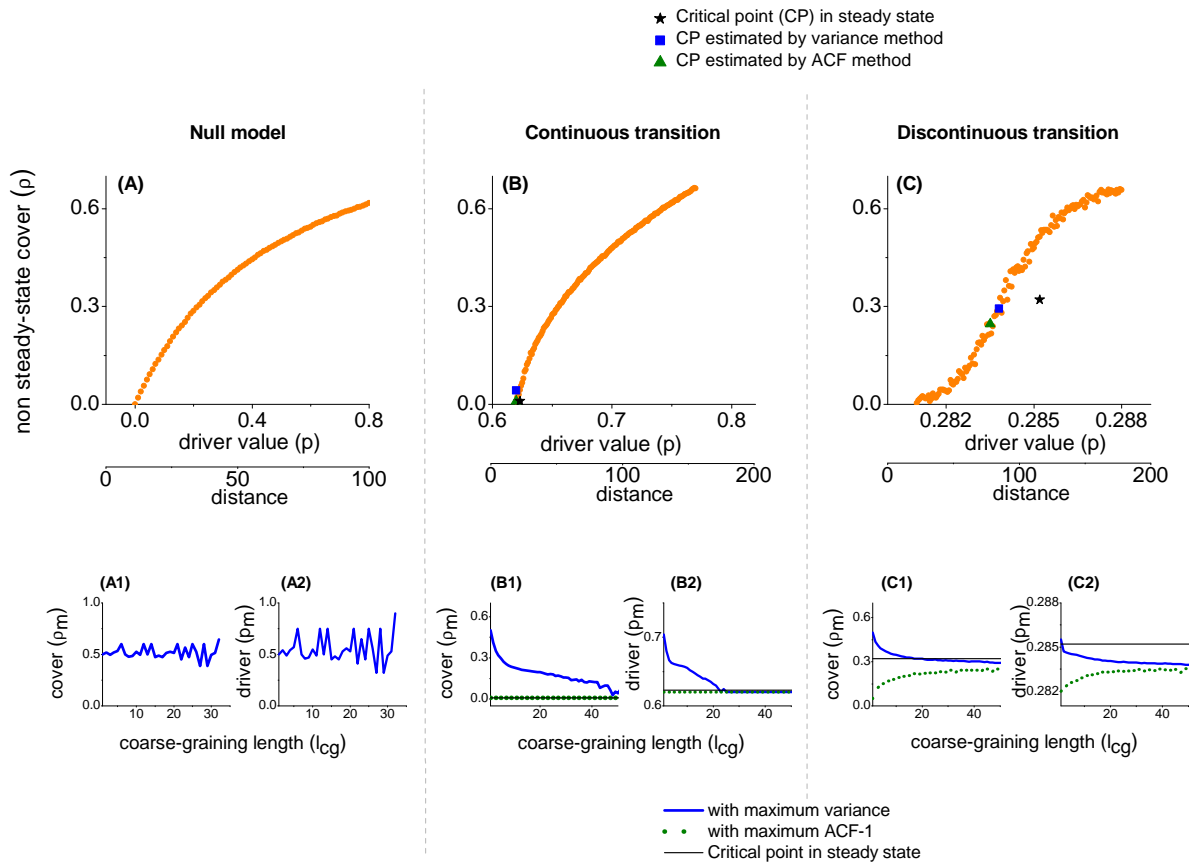

**Figure 1:** Simulations of spatially-explicit ecological models show that even for data arising from nonsteady state and gradient-driver conditions, estimated critical points (blue squares and green triangles in B and C) are reasonably close to the critical point in steady states (black star). In the null model with no critical points (A), as theoretically expected, the peak of spatial variance occurs around density of 0.5 for all coarse-graining lengths (A1, A2), but there is no peak for spatial ACF-1 (see Fig. S2, S3 in Appendix S2). Thus, we infer there is no critical point for the null model. In the continuous transition model (B), peaks of spatial variance and ACF-1 (B1, B2) converge close to the steady state critical points. In (C, C1 and C2), we find qualitatively similar results for the discontinuous transition model.

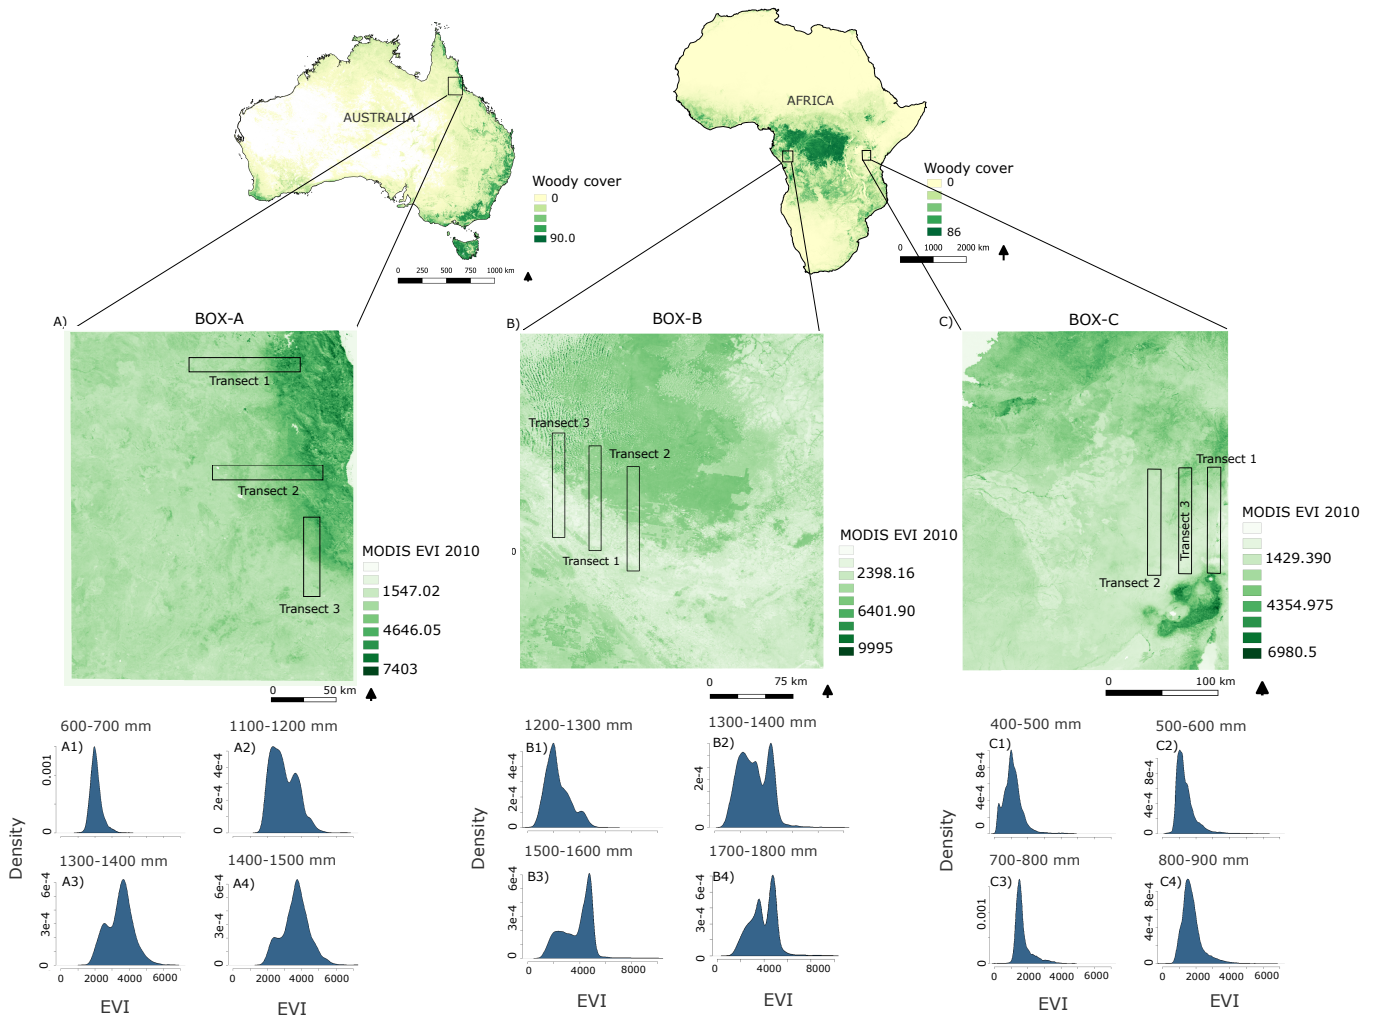

**Figure 2:** Location of study sites and the transects. (A, B and C) show the spatial distribution of EVI in Box-A (Australia), Box-B (Congo-Gabon in Africa) and Box-C (Serengeti in Africa) respectively. (A1-A4 and B1-B4) show that EVI changes from a unimodal to a bimodal frequency distribution as a function of mean annual rainfall within Box A and B. (C1-C4) show that EVI distributions remain unimodal for all the rainfall ranges in Box-C.

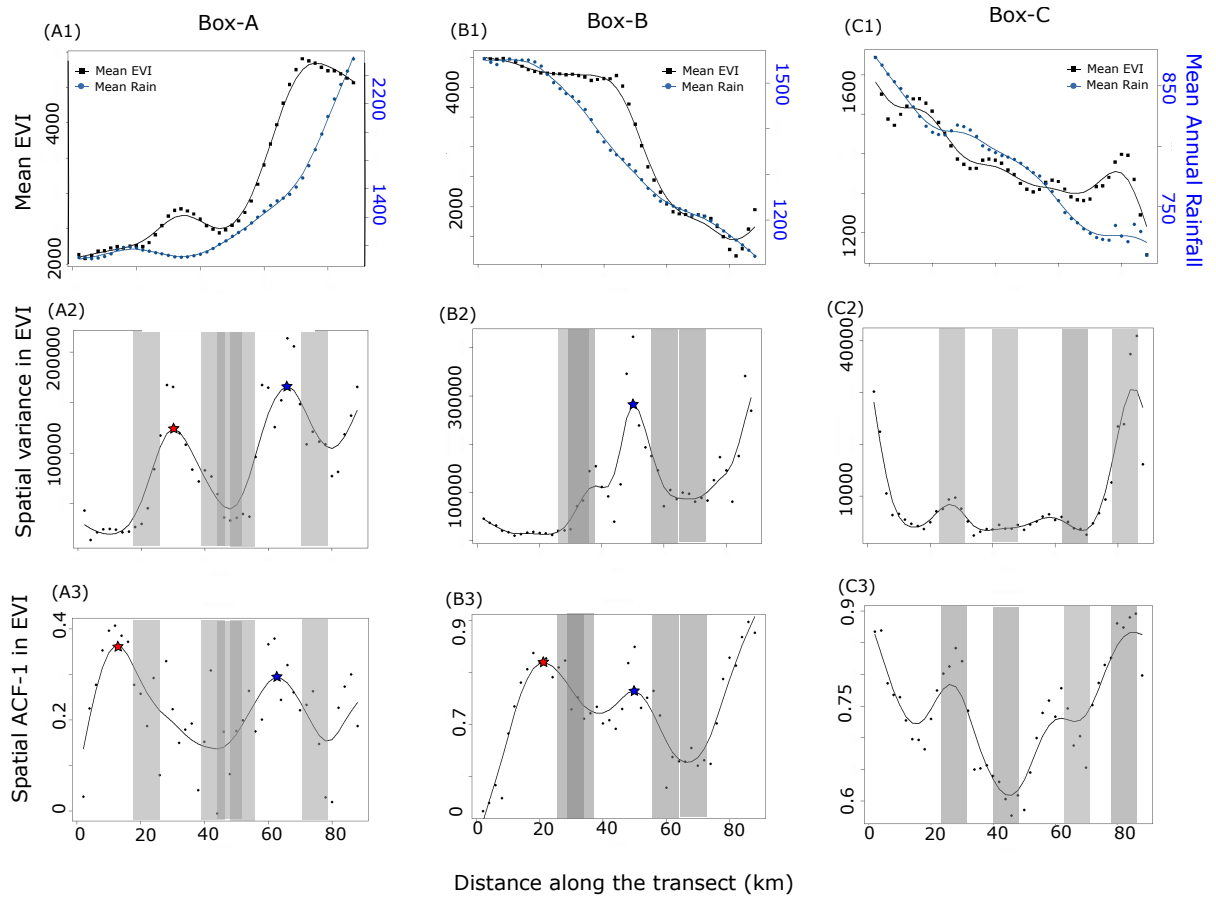

**Figure 3:** Estimation of critical points (blue stars in A2, B2, A3, B3) from the analyses of transects after eliminating confounding factors arising from landscape heterogeneity (grey bands). First row: EVI and mean annual rainfall both change along transect length. Second and third rows show spatial variance and spatial ACF-1 in EVI, respectively, along transects. We discarded regions of transects (grey bands) dominated by local heterogeneity in soil, slope, aspect or elevation (also see Fig. S13, S14, S15 in Appendix S5). In the remaining region, we identified peaks in both spatial metrics that occur within 4 km of each other as coinciding peaks (blue stars in A2, A3, B2 and B3). We estimated the associated rainfall value as the critical points (Table 1). The control Box C, which did not show bimodality, offered no estimates, consistent with the theory. Scatter data represent measurements on a moving window of  $8 \text{ km} \times 8 \text{ km}$  with a moving distance of 2 km; connecting solid line is obtained by a smoothing function with the smoothing parameter ( $\text{spar}$ ) = 0.6.

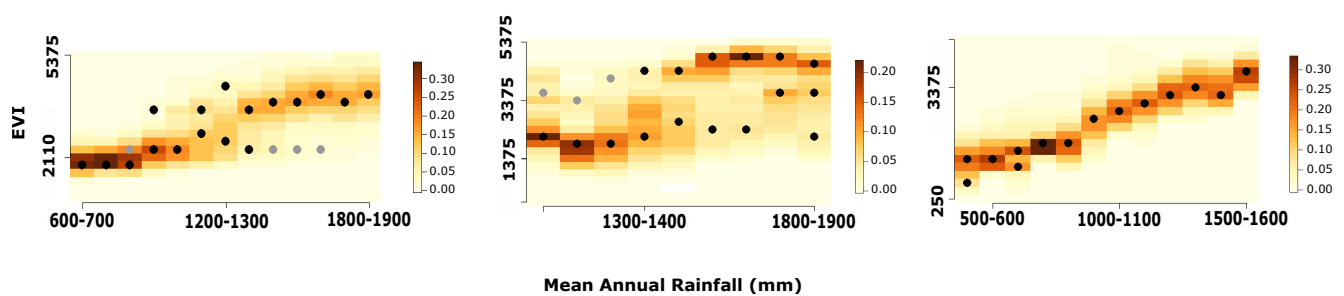

**Figure 4:** State diagrams for the three boxes. (A and B) show that Box-A and Box-B have two EVI modes occurring at comparable values of mean annual rainfall (between 1000 mm to 1300 mm in Box-A and above 1300 mm in Box-B). For each rainfall bin, rainfall does not show bimodality (see Appendix S4). These suggest evidence for alternative stable states in EVI. For each rainfall bin, black dots show the location of modes of EVI density whereas colour maps, plotted using `image.plot` in R, show the density of EVI. If the ratio of the density at two modes is less than 0.25, it is plotted as a grey dot. (C) does not show bimodality.
